# Supplementary material for: 15-Year Analysis of Direct Effects of Total and Dust Aerosols in Solar Radiation/Energy over the Mediterranean Basin
Source: MDPI journal article supplement (doi:10.3390/rs14071535), 2022-03-22
Supplement: s1 [file s1]

Archive with 1 entries (1 files):
- remotesensing-1594678-supplementary.pdf
