# Supplementary material for: 15-Year Analysis of Direct Effects of Total and Dust Aerosols in Solar Radiation/Energy over the Mediterranean Basin
Source: MDPI journal article supplement (doi:10.3390/rs14071535), 2022-03-22
Supplement: s1 [file s1 › remotesensing-1594678-supplementary.pdf]

Article

# 15-Year Analysis of Direct Effects of Total and Dust Aerosols in Solar Radiation/Energy over the Mediterranean Basin

## Supplement

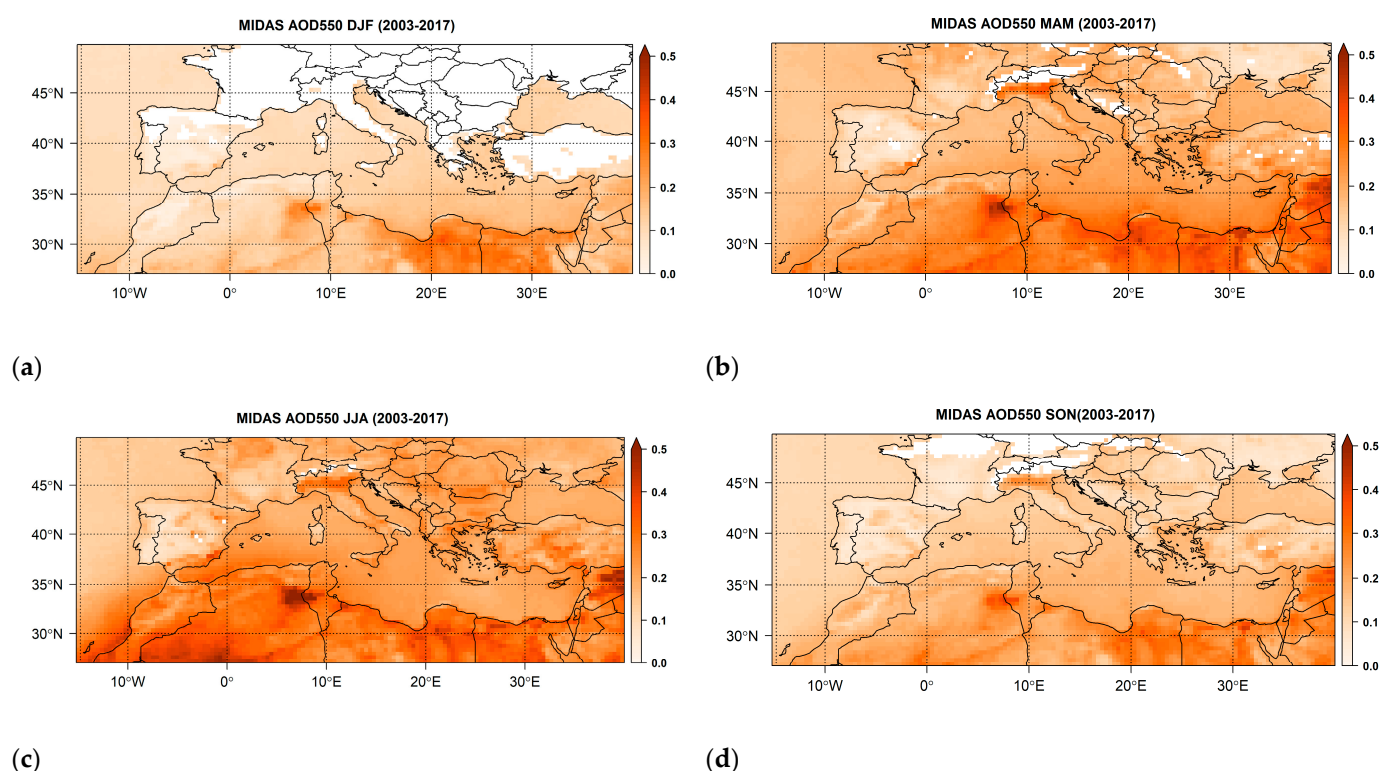

**Figure S1.** Geographical distribution of long-term average of seasonal mean AOD at 550nm from MODIS. Blank grid points are those that did not fulfill the criterion of at least 20% data availability on annual basis.

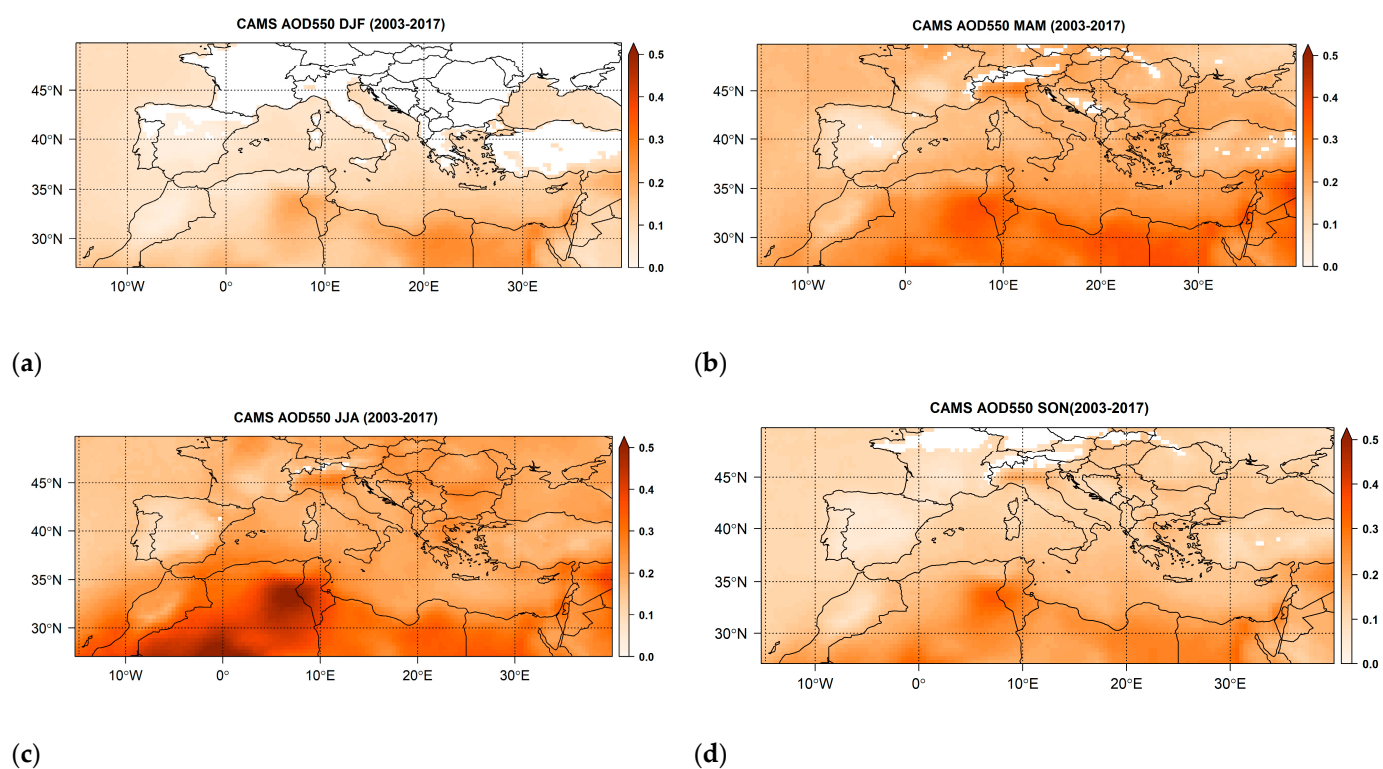

**Figure S2.** Geographical distribution of long-term average of seasonal mean AOD at 550nm from CAMS. Blank grid points are those that did not fulfill the criterion of at least 20% data availability on annual basis.

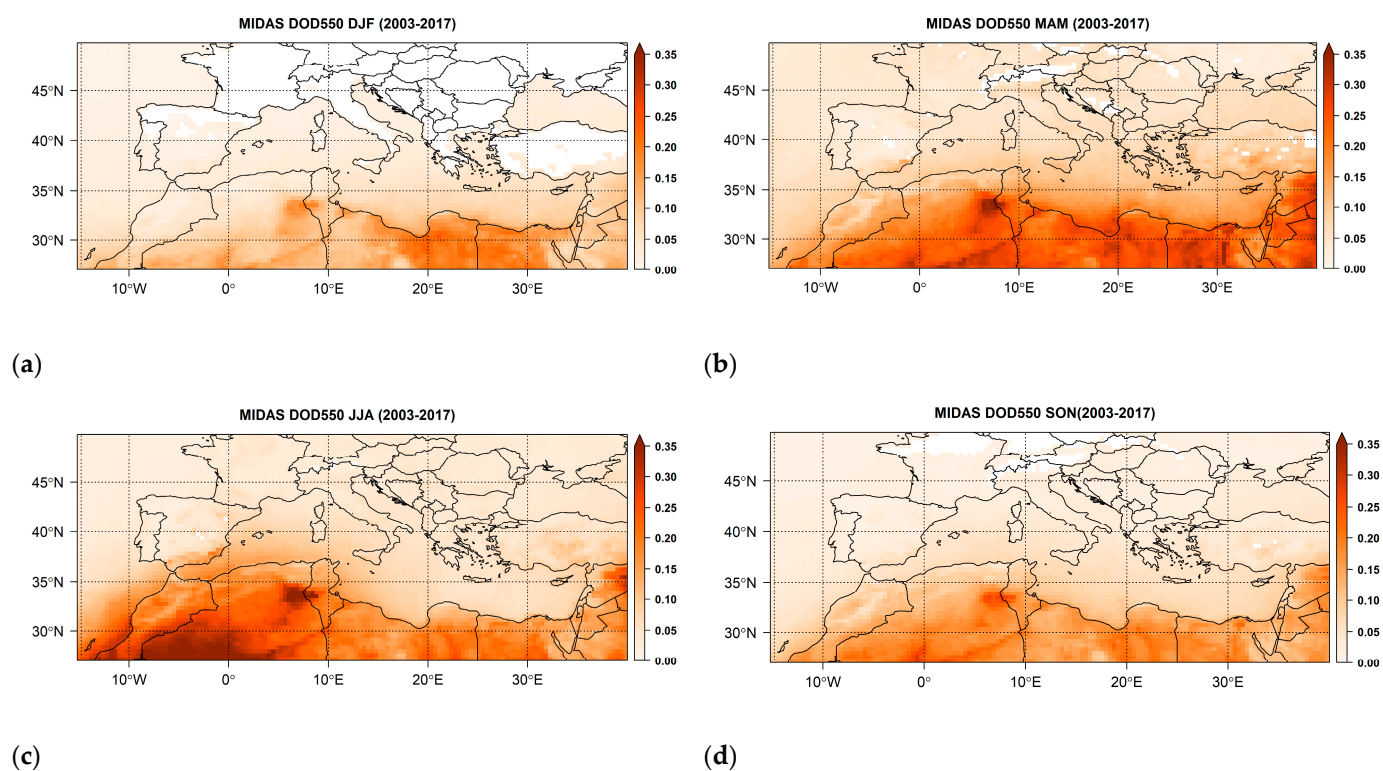

**Figure S3.** Geographical distribution of long-term average of seasonal mean DOD at 550nm from MIDAS. Blank grid points are those that did not fulfill the criterion of at least 20% data availability on annual basis.

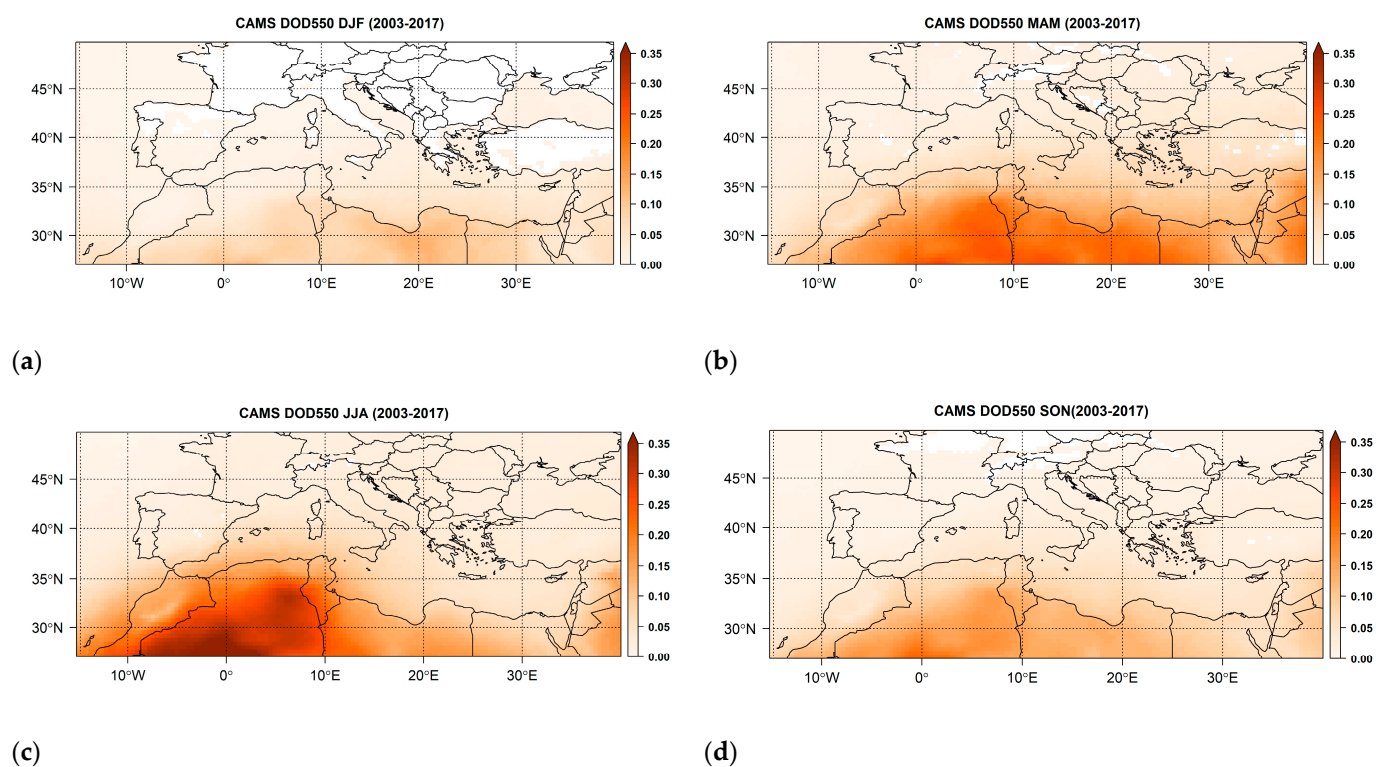

**Figure S4.** Geographical distribution of long-term average of seasonal mean DOD at 550nm from CAMS. Blank grid points are those that did not fulfill the criterion of at least 20% data availability on annual basis.

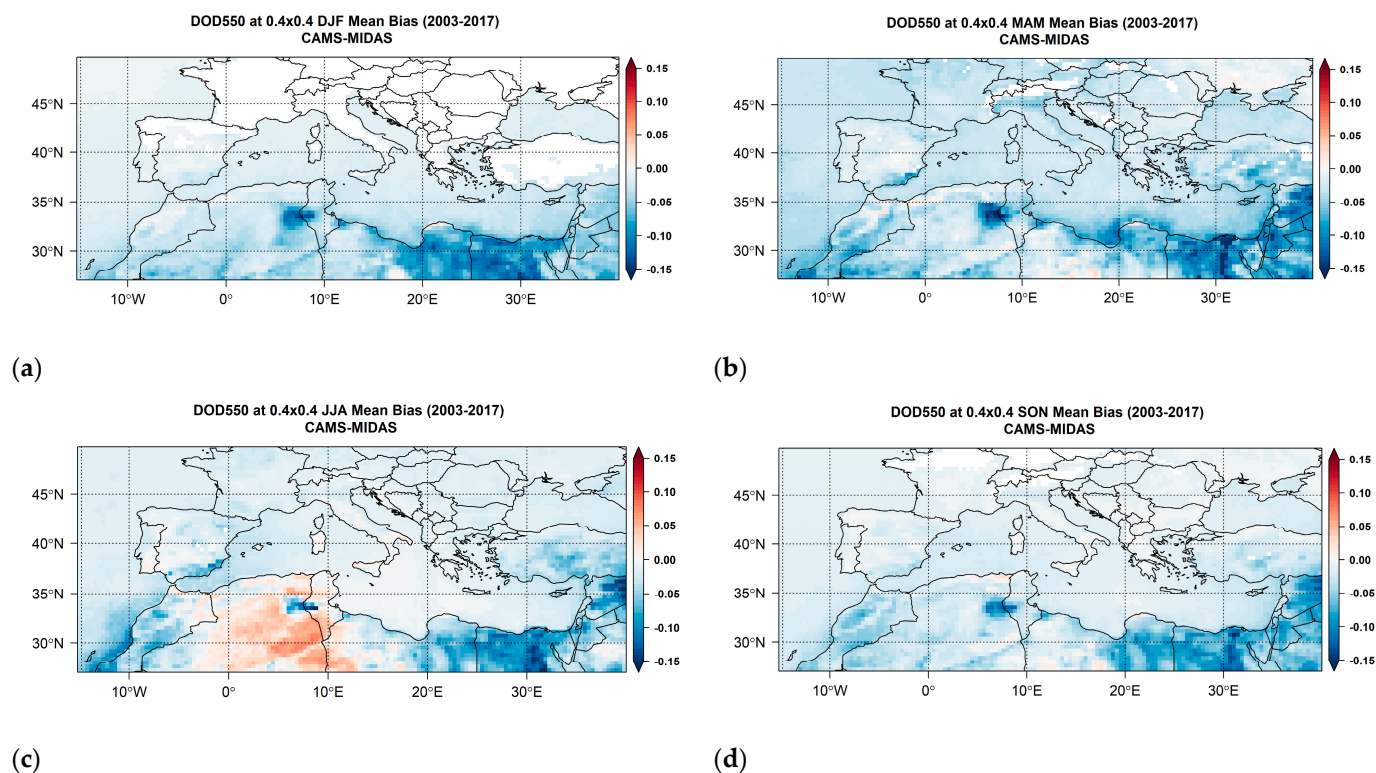

**Figure S5.** Geographical distribution of annual mean CAMS-MIDAS DOD biases. Blank grid points are those that did not fulfill the criterion of at least 20% data availability on annual basis.

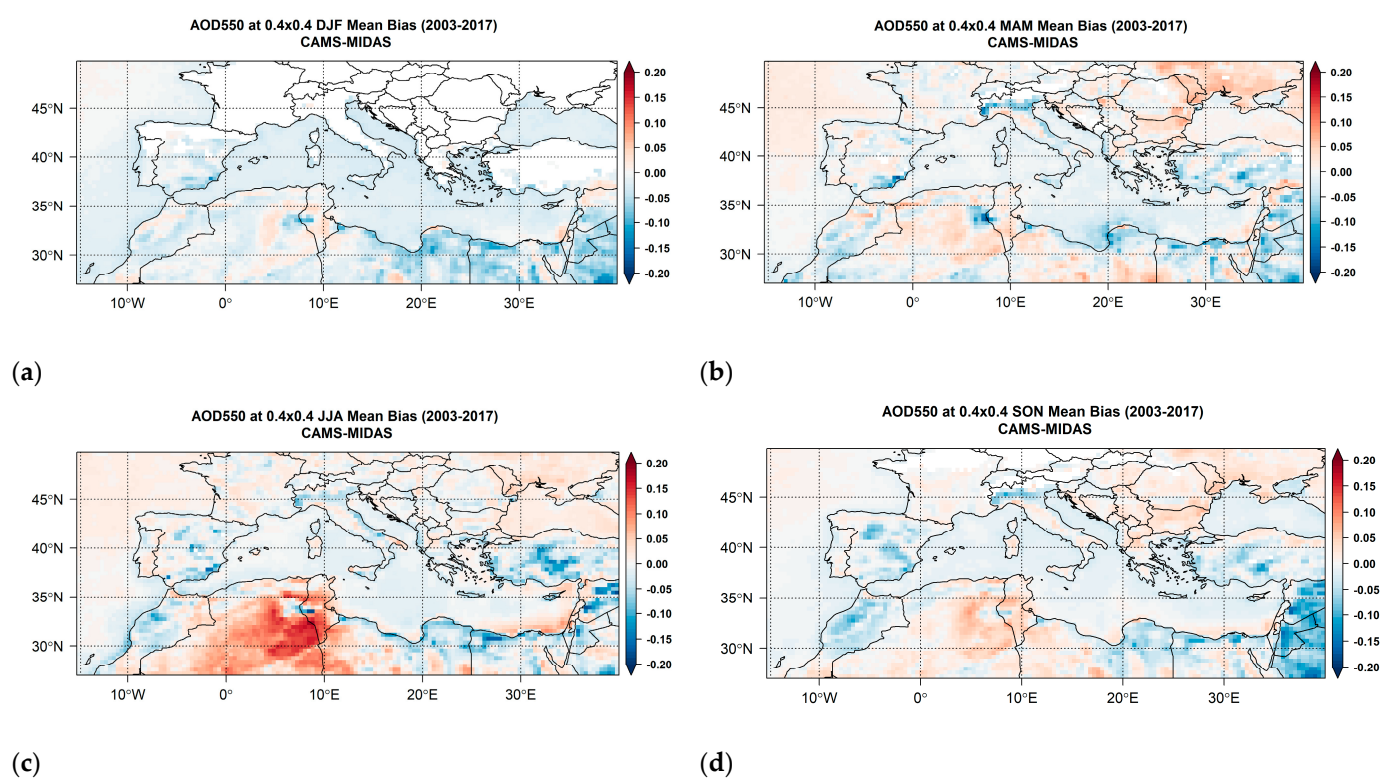

**Figure S6.** Geographical distribution of annual mean CAMS-MIDAS AOD biases. Blank grid points are those that did not fulfill the criterion of at least 20% data availability on annual basis.

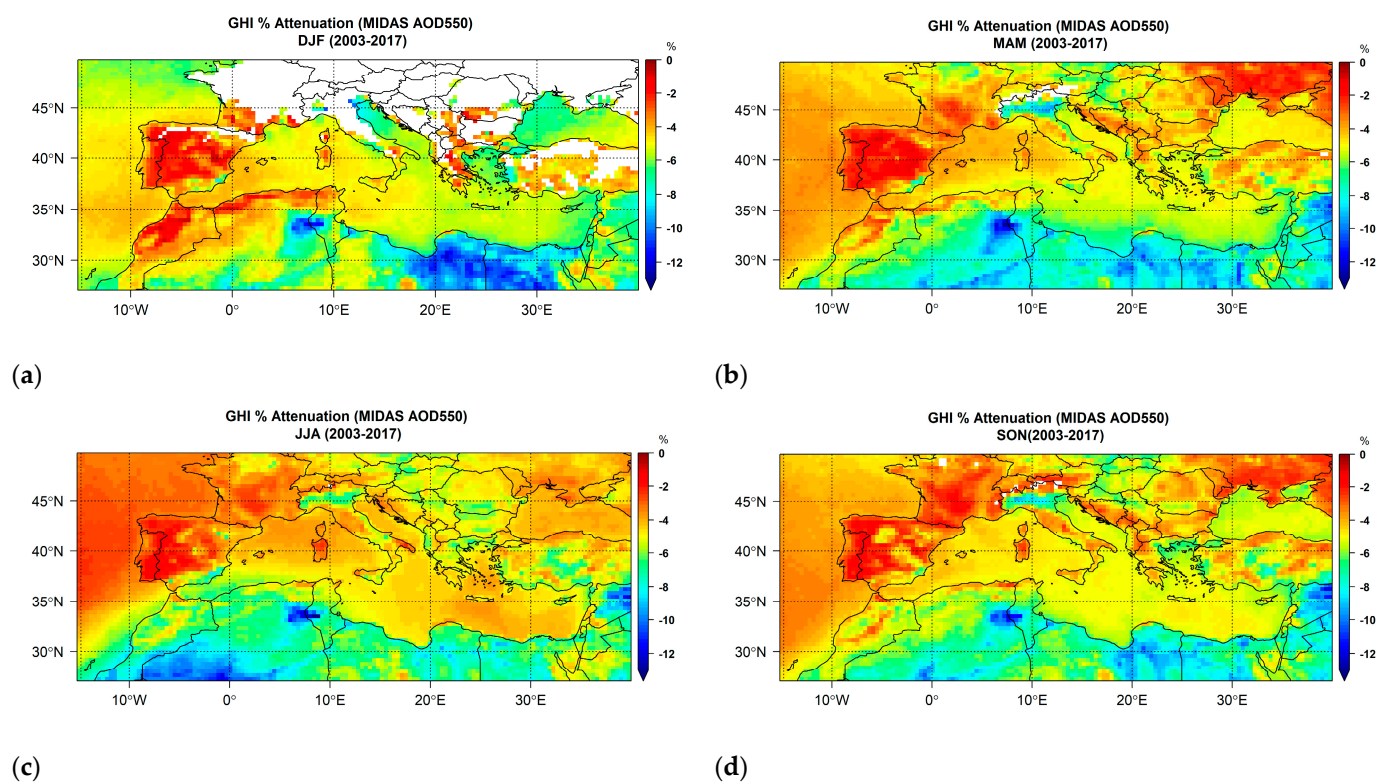

**Figure S7.** Change (in %) of the mean seasonal integral of GHI due to the presence of aerosols under MODIS AOD. Blank grid points are those that did not fulfill the criterion of at least 20% data availability on annual basis.

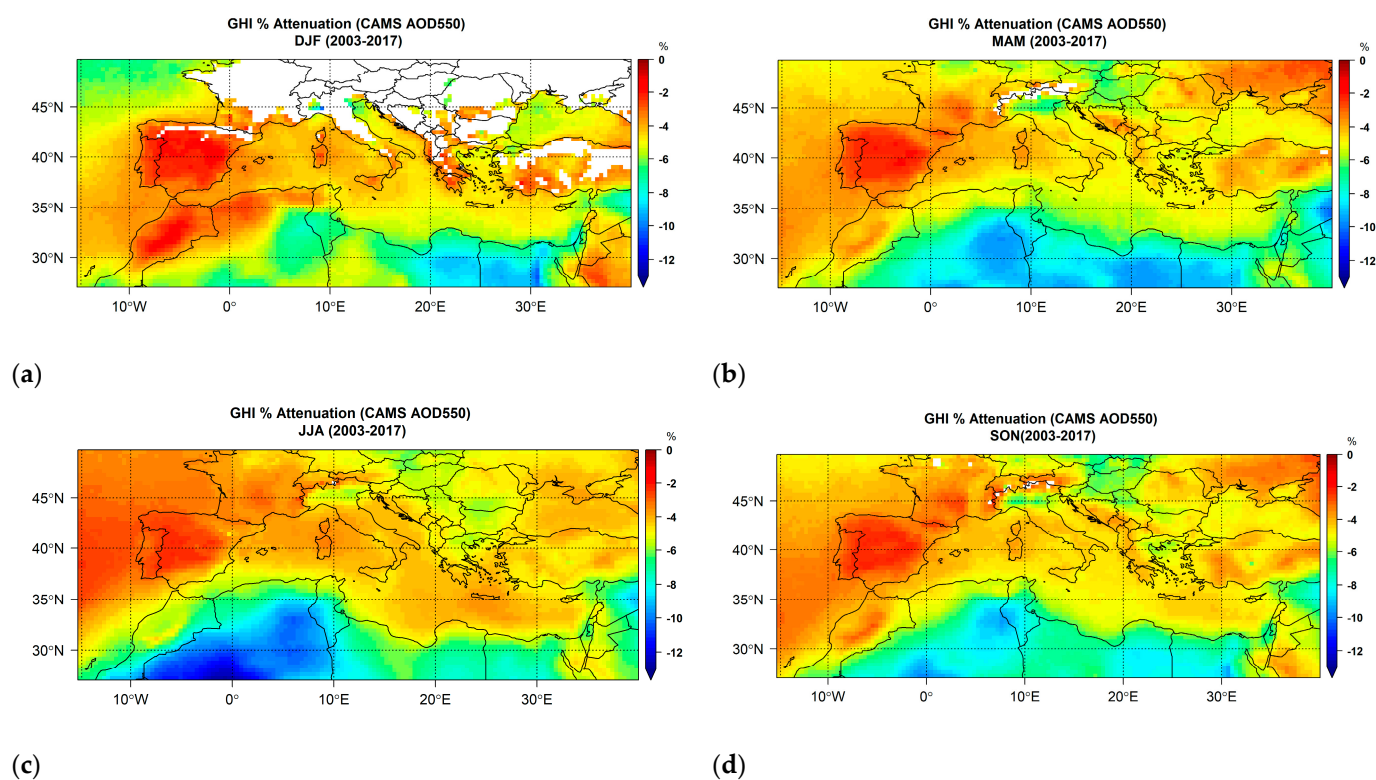

**Figure S8.** Change (in %) of the mean seasonal integral of GHI due to the presence of aerosols under CAMS AOD. Blank grid points are those that did not fulfill the criterion of at least 20% data availability on annual basis.

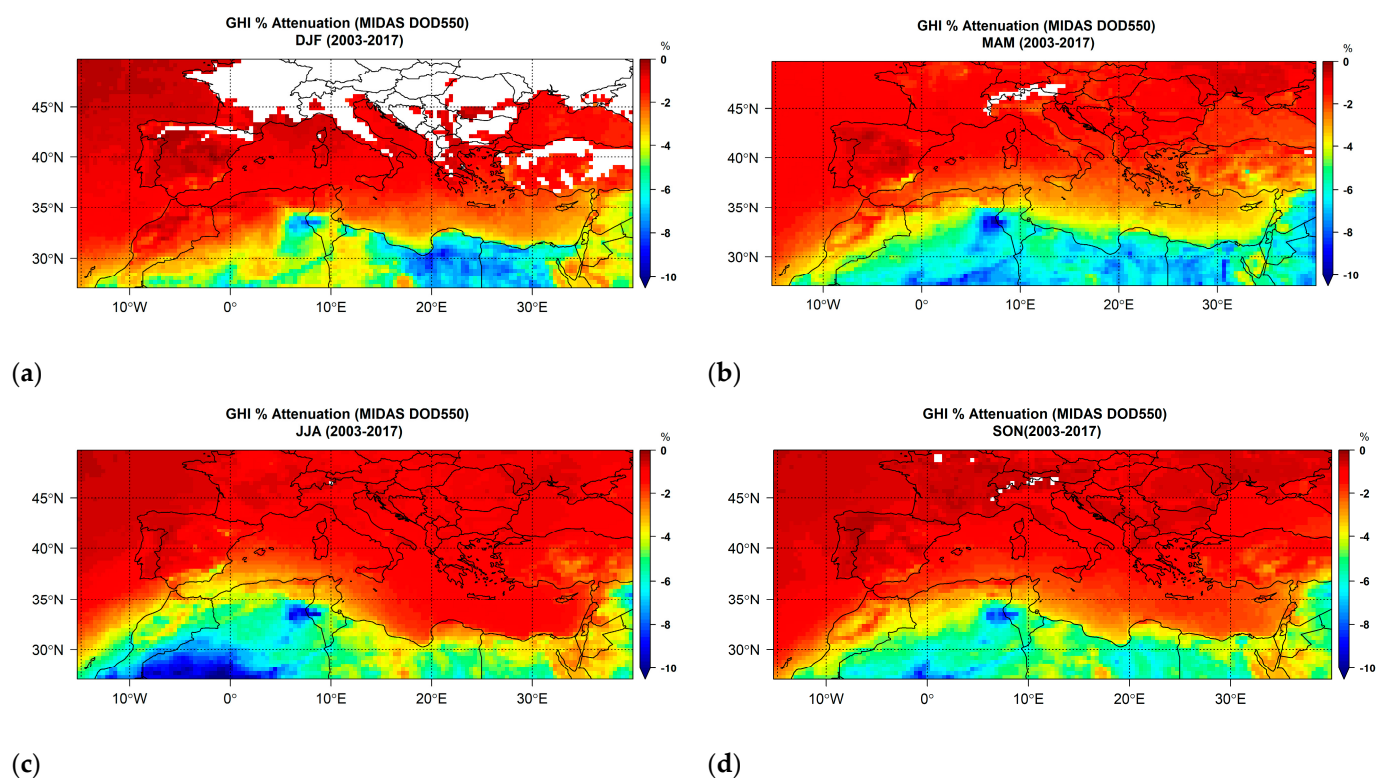

**Figure S9.** Change (in %) of the mean annual integral of GHI due to the presence of dust under MIDAS DOD. Blank grid points are those that did not fulfill the criterion of at least 20% data availability on annual basis.

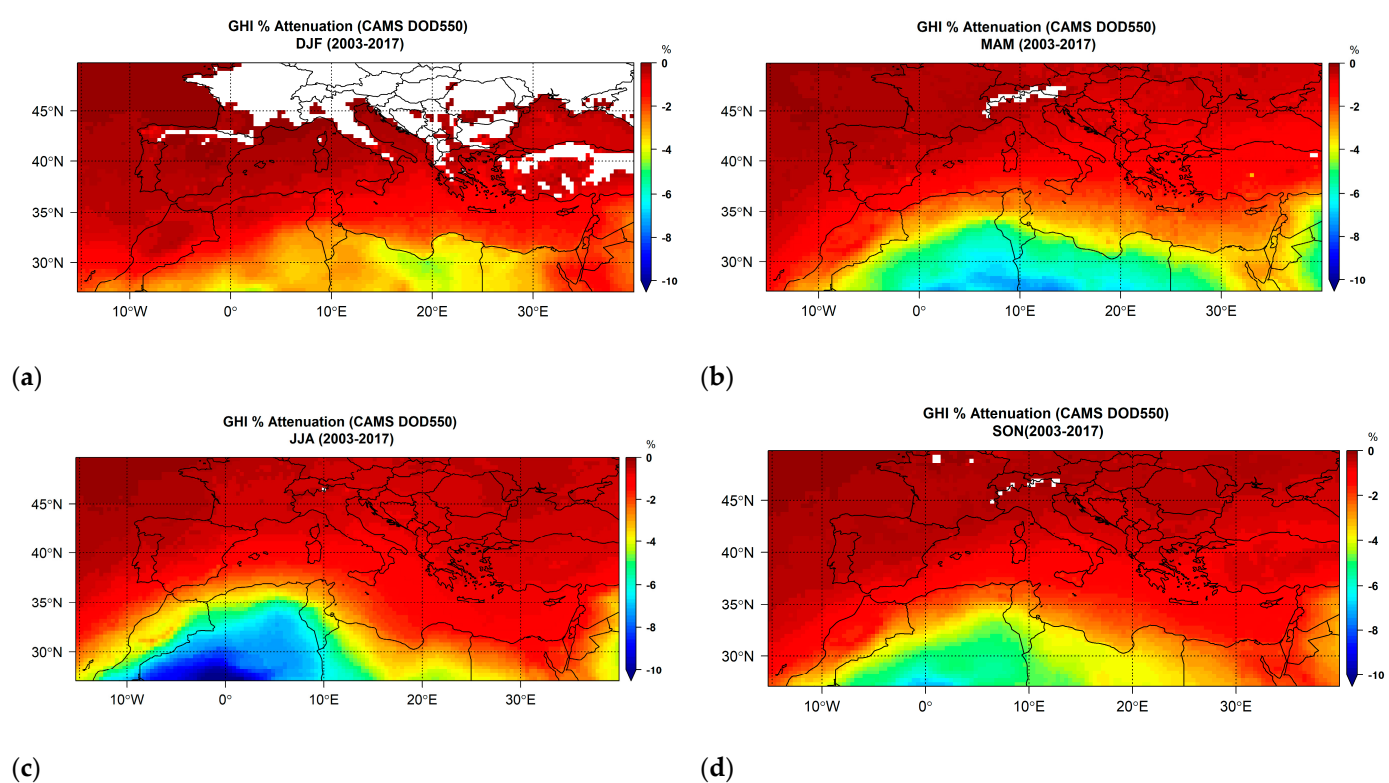

**Figure S10.** Change (in %) of the mean annual integral of GHI due to the presence of dust under CAMS DOD. Blank grid points are those that did not fulfill the criterion of at least 20% data availability on annual basis.

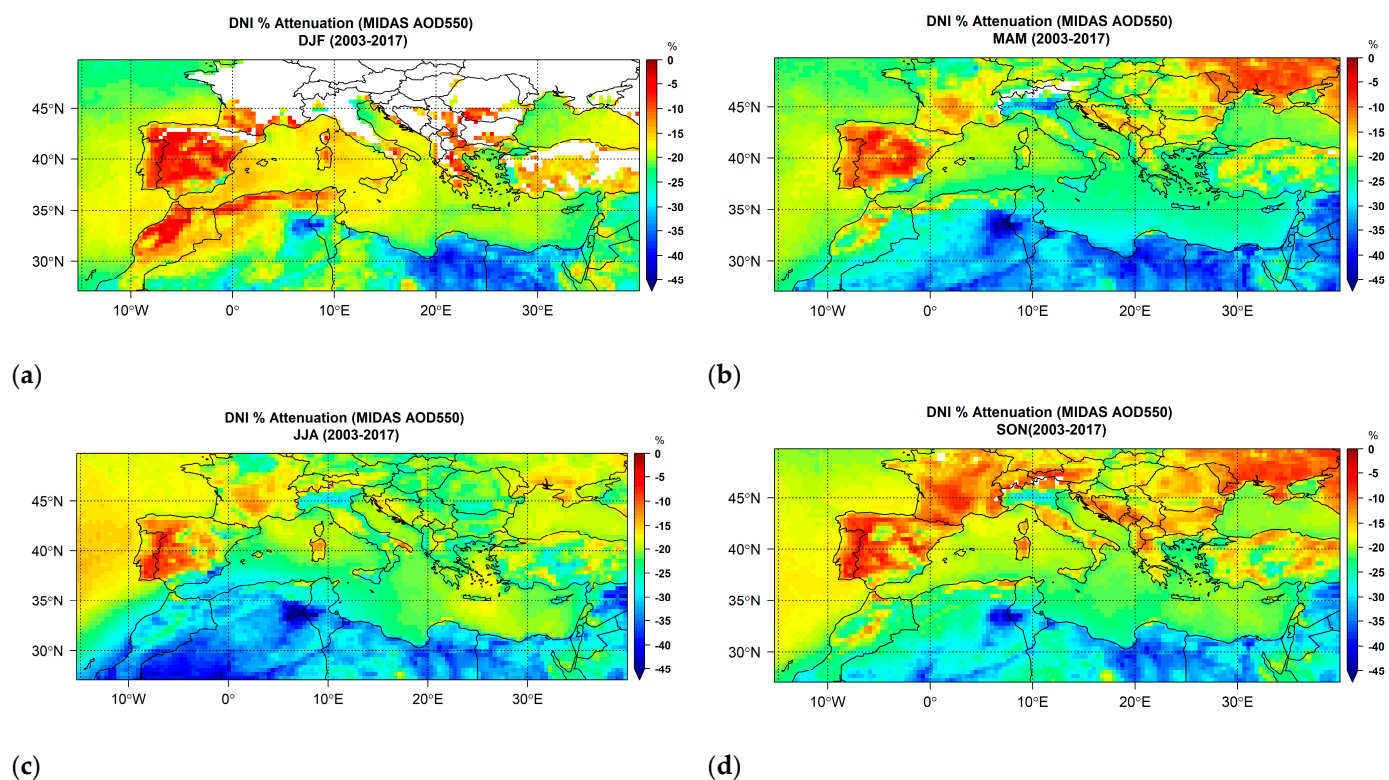

**Figure S11.** Change (in %) of the mean annual integral of DNI due to the presence of aerosols under MODIS AOD. Blank grid points are those that did not fulfill the criterion of at least 20% data availability on annual basis.

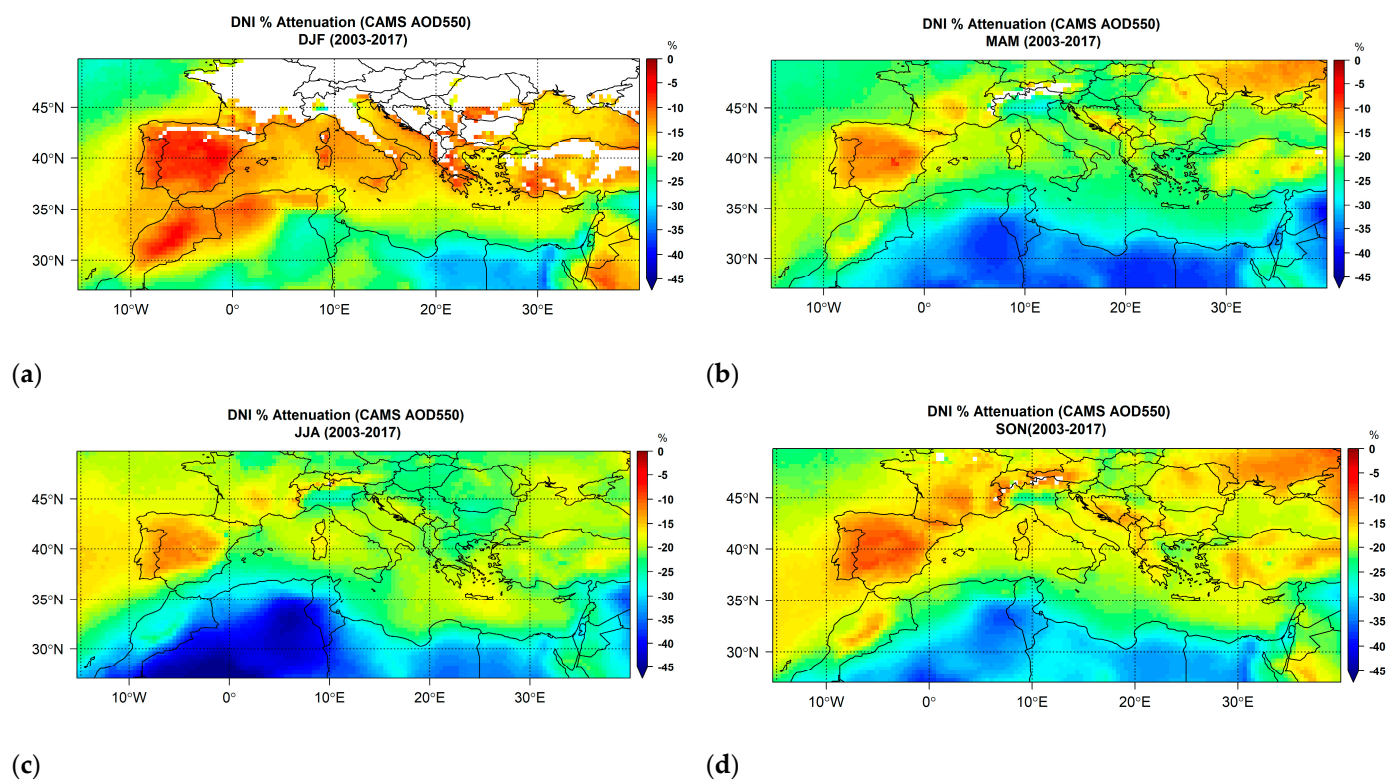

**Figure S12.** Change (in %) of the mean annual integral of DNI due to the presence of aerosols under CAMS AOD. Blank grid points are those that did not fulfill the criterion of at least 20% data availability on annual basis.

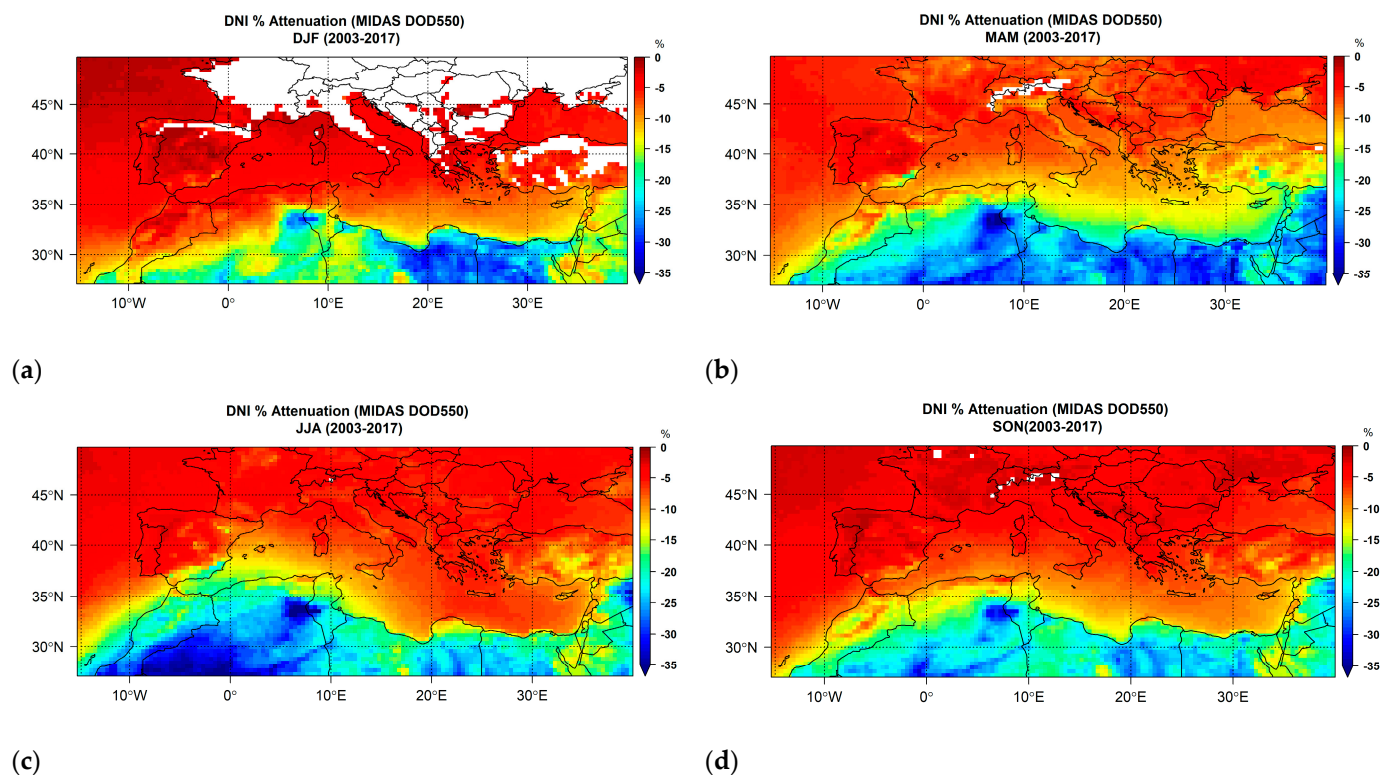

**Figure S13.** Change (in %) of the mean annual integral of DNI due to the presence of dust under MIDAS DOD. Blank grid points are those that did not fulfill the criterion of at least 20% data availability on annual basis.

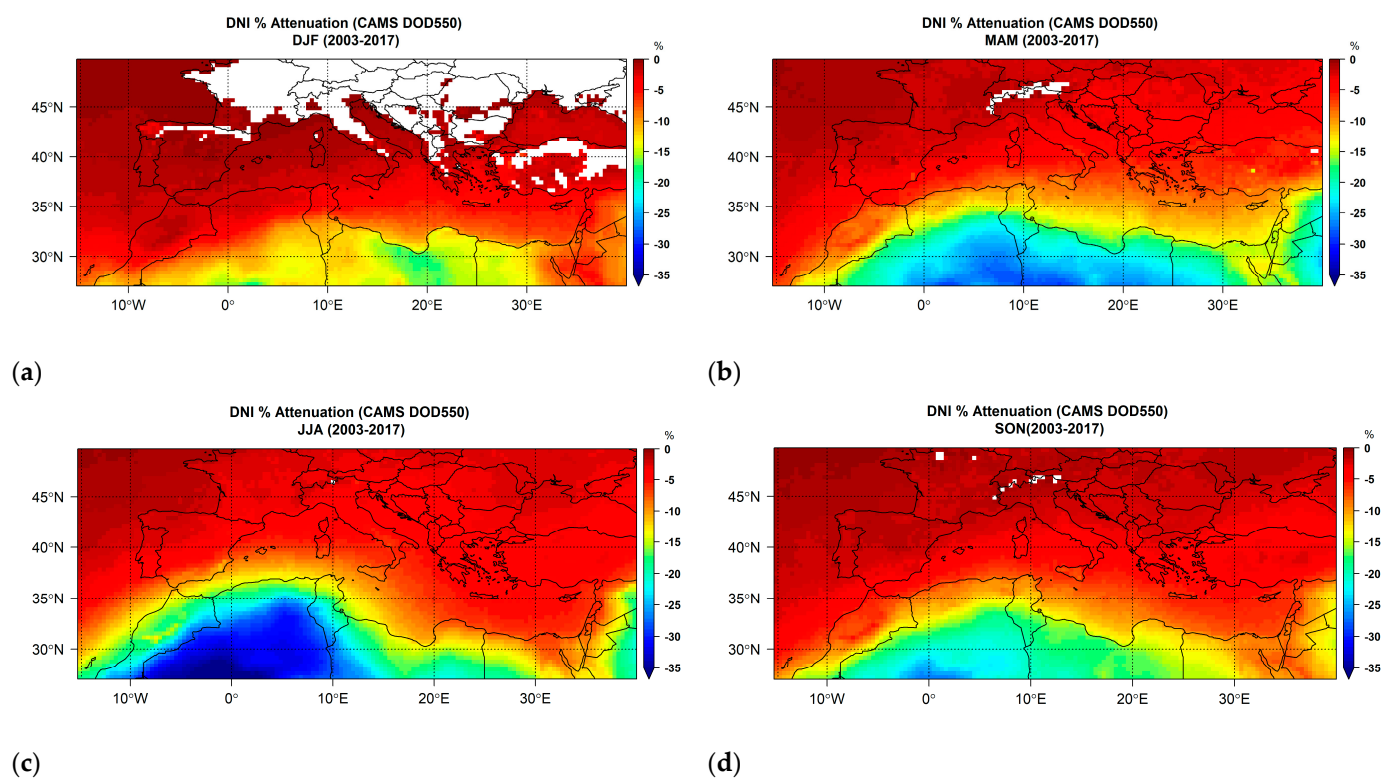

**Figure S14.** Change (in %) of the mean annual integral of DNI due to the presence of dust under CAMS DOD. Blank grid points are those that did not fulfill the criterion of at least 20% data availability on annual basis.

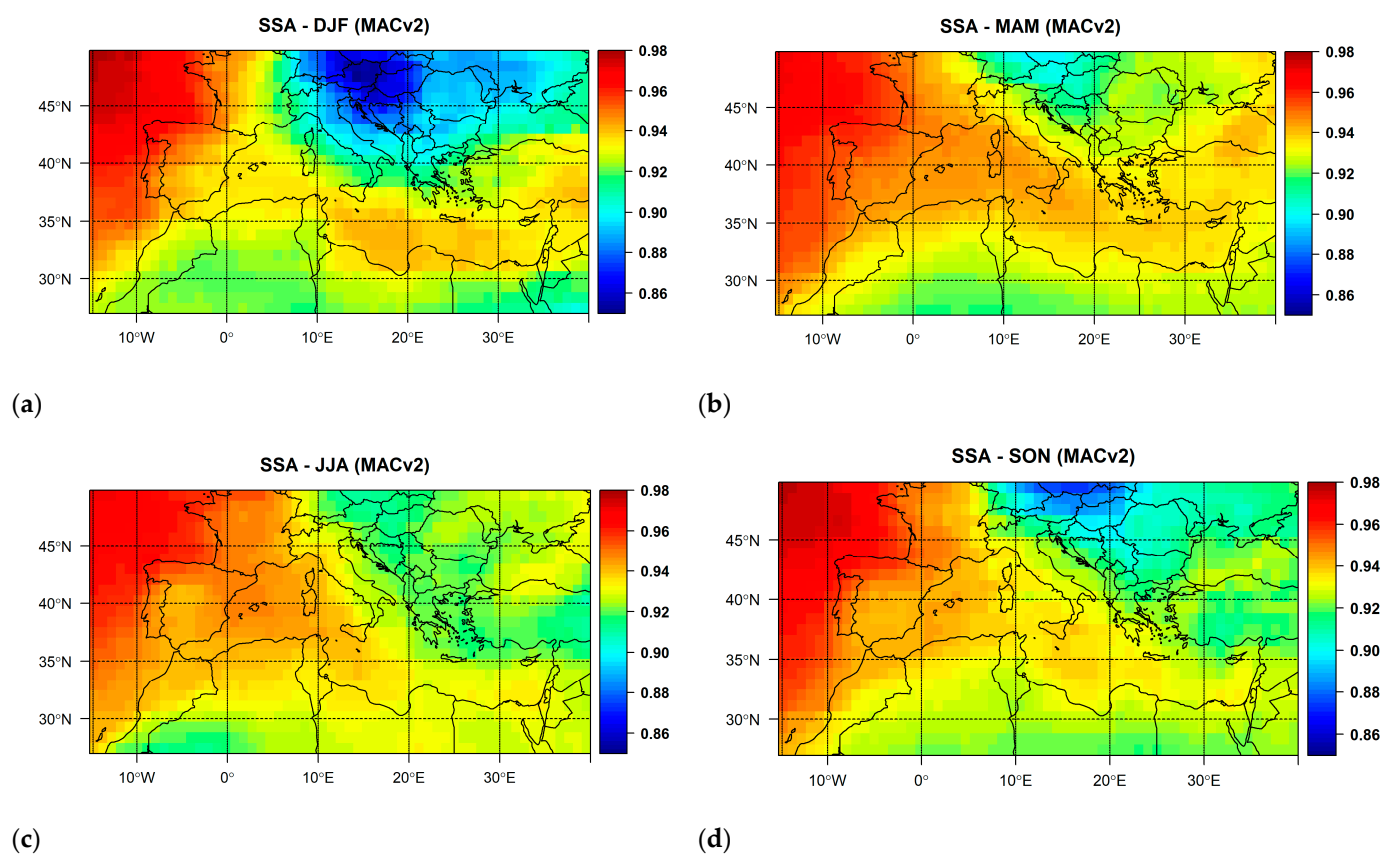

**Figure S15.** Geographical distribution of seasonal mean SSA (MACv2 [63]).

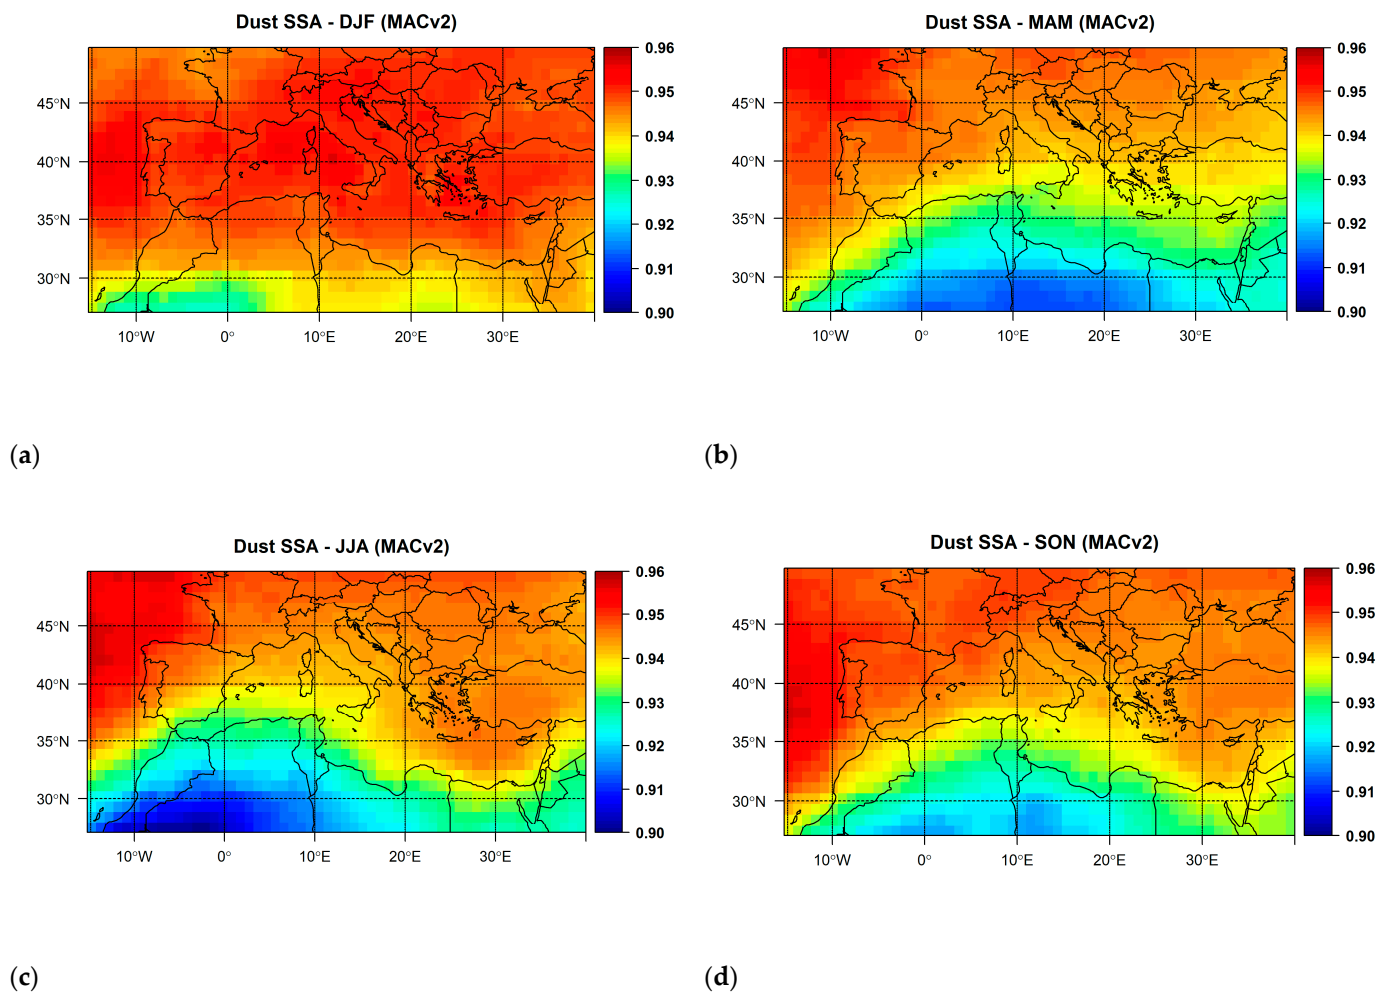

**Figure S16.** Geographical distribution of seasonal mean DU SSA (MACv2 [63]).

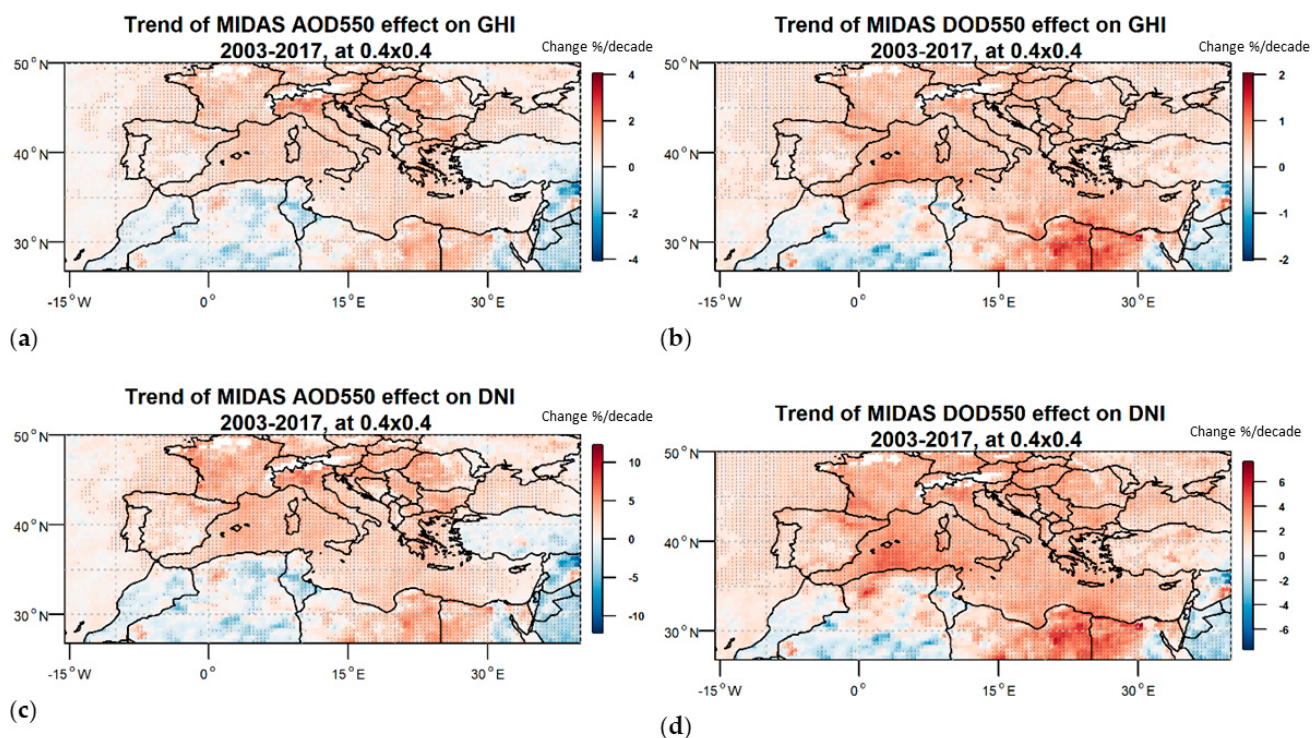

**Figure S17.** Trends in % per decade for GHI (panels (a,b)) and DNI (panels (c,d)) due to the changes in AOD (panels (a,c)) and DOD (panels (b,d)).

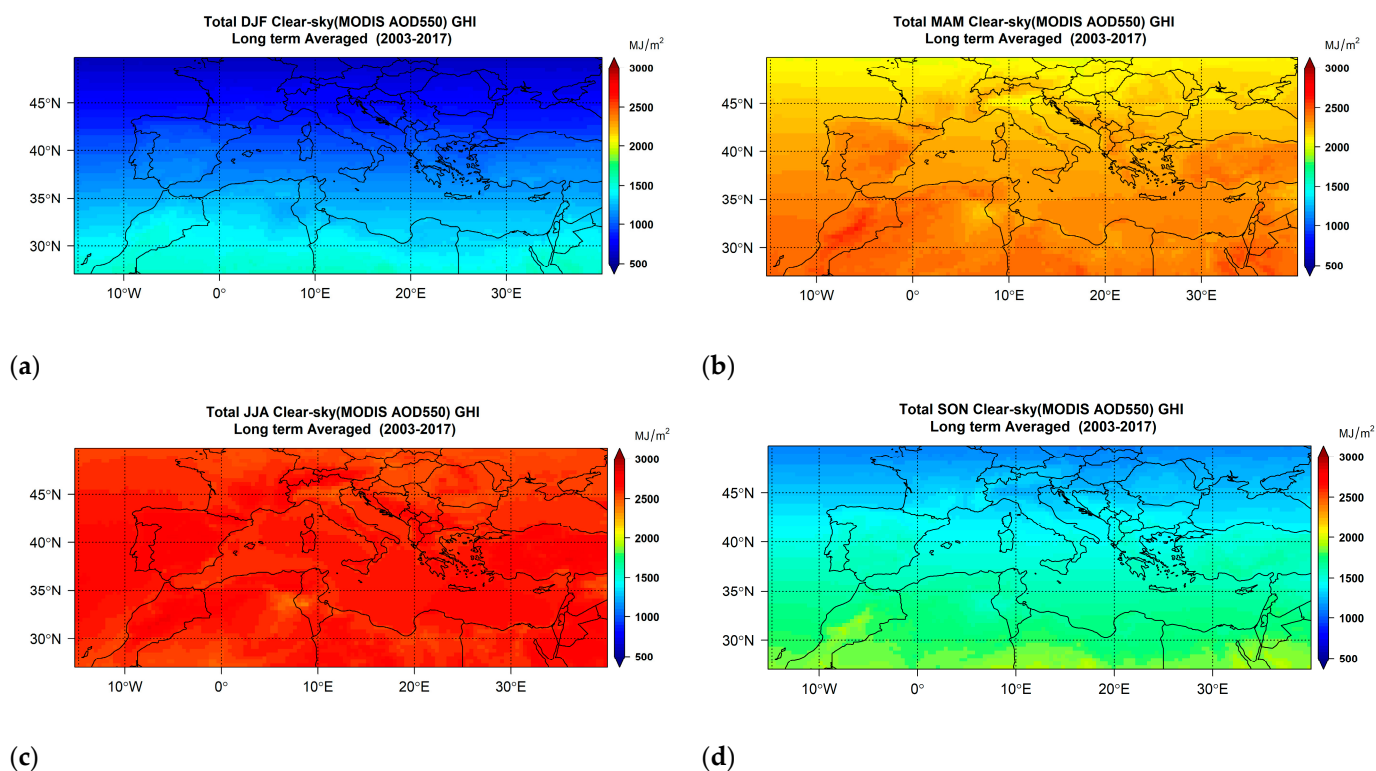

**Figure S18.** Mean seasonal integrals for clear-sky GHI using MODIS AOD.

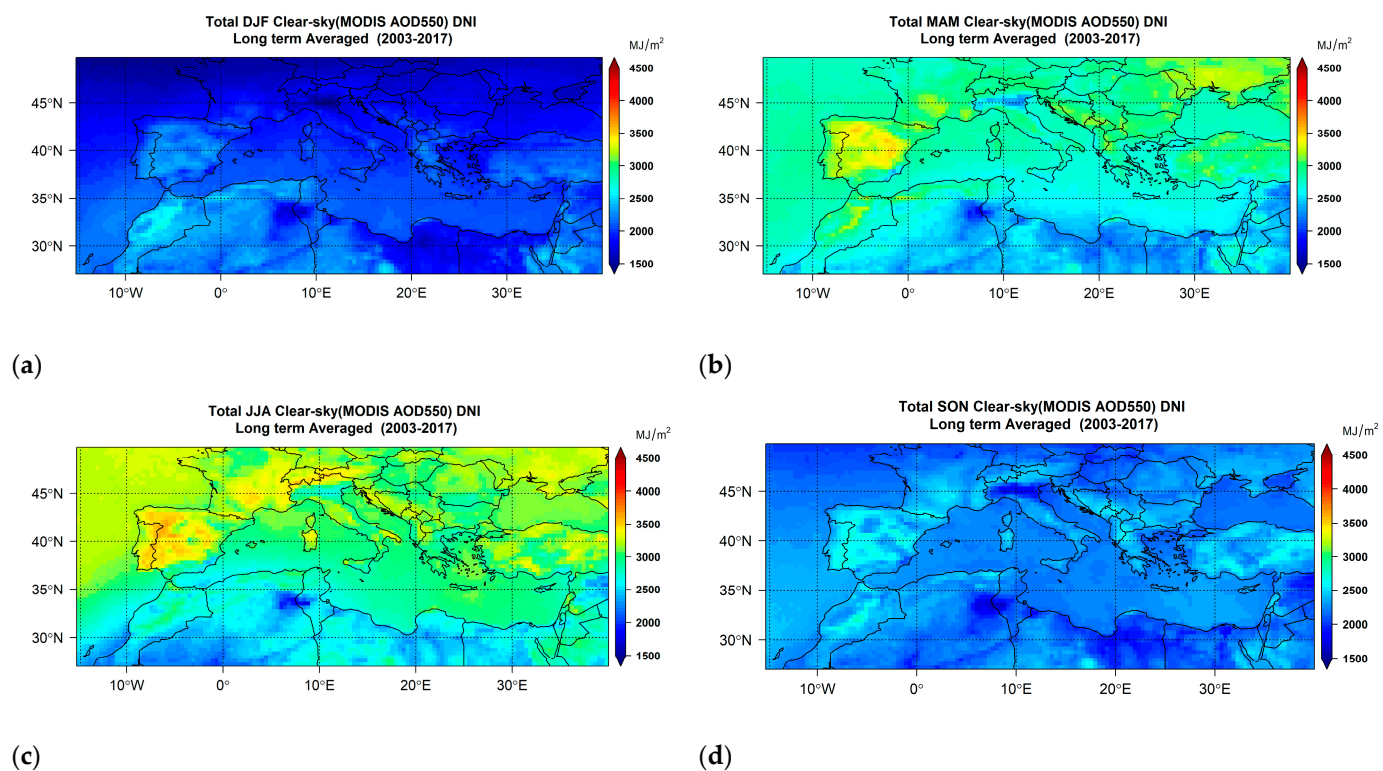

**Figure S19.** Mean seasonal integrals for clear-sky DNI using MODIS AOD.
